# Supplementary material for: All-Trans Retinoic Acid Effect on Candida albicans Growth and Biofilm Formation
Source: MDPI journal article supplement (doi:10.3390/jof8101049), 2022-10-05
Supplement: s1 [file s1]

**Table S1.** Effect of ATRA on biomass and metabolic activity of *C. albicans* biofilm. *Candida* cultures were incubated for 24 h in the absence or presence of ATRA at various concentrations (1- 0.06 mM). Biofilm growth was analyzed as total biomass and metabolic activity by CV and XTT reduction methods, respectively. The absorbance intensity was measured using a spectrophotometer plate reader at 595 nm for CV and 490 nm for XTT assay. The results of mean OD  $\pm$  SD of three independent experiments, carried out in triplicate, have been reported. AmB (2- 0.12  $\mu$ g/mL) was used as positive control drug.

|                                              |                     | mean value OD | SD    | % of inhibition |
|----------------------------------------------|---------------------|---------------|-------|-----------------|
| <b>Biomass at baseline</b>                   | ATRA 1 mM           | 0.082         | 0.036 |                 |
|                                              | ATRA 0.5 mM         | 0.086         | 0.032 |                 |
|                                              |                     |               |       |                 |
|                                              | AmB 2 $\mu$ g/mL    | 0.073         | 0.002 |                 |
|                                              | AmB 1 $\mu$ g/mL    | 0.079         | 0.002 |                 |
| <b>Biofilm biomass after 24 h</b>            | Control             | 0.65          | 0.014 |                 |
|                                              | ATRA 1mM            | 0.064         | 0.006 | 90              |
|                                              | ATRA 0.5mM          | 0.091         | 0.003 | 86              |
|                                              | ATRA 0.25mM         | 0.153         | 0.052 | 76              |
|                                              | ATRA 0.12mM         | 0.316         | 0.019 | 50              |
|                                              | ATRA 0.06mM         | 0.59          | 0.011 | 5               |
|                                              |                     |               |       |                 |
|                                              | AmB 2 $\mu$ g/mL    | 0.071         | 0.008 | 90              |
|                                              | AmB 1 $\mu$ g/mL    | 0.076         | 0.008 | 89              |
|                                              | AmB 0.5 $\mu$ g/mL  | 0.084         | 0.012 | 87              |
|                                              | AmB 0.25 $\mu$ g/mL | 0.176         | 0.035 | 73              |
|                                              | AmB 0.12 $\mu$ g/mL | 0.493         | 0.023 | 25              |
| <b>Biofilm metabolic activity after 24 h</b> | Control             | 0.62          | 0.031 |                 |
|                                              | ATRA 1mM            | 0.064         | 0.002 | 90              |
|                                              | ATRA 0.5mM          | 0.091         | 0.001 | 86              |
|                                              | ATRA 0.25mM         | 0.26          | 0.005 | 59              |
|                                              | ATRA 0.12mM         | 0.443         | 0.047 | 29              |
|                                              | ATRA 0.06mM         | 0.605         | 0.044 | 3               |
|                                              |                     |               |       |                 |
|                                              | AmB 2 $\mu$ g/mL    | 0.07          | 0.035 | 89              |
|                                              | AmB 1 $\mu$ g/mL    | 0.112         | 0.031 | 82              |
|                                              | AmB 0.5 $\mu$ g/mL  | 0.20          | 0.006 | 68              |
|                                              | AmB 0.25 $\mu$ g/mL | 0.333         | 0.031 | 47              |
|                                              | AmB 0.12 $\mu$ g/mL | 0.544         | 0.033 | 9               |

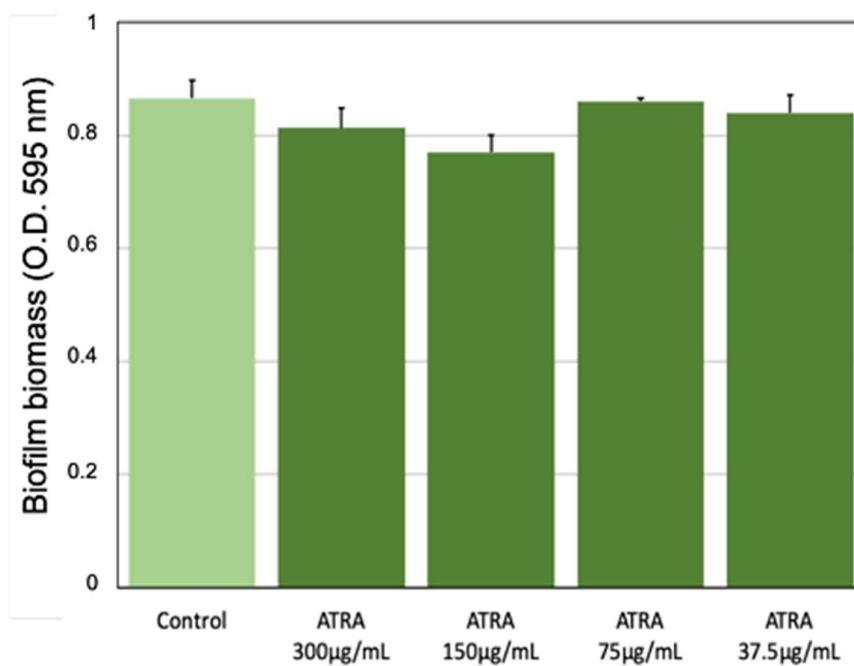

**Figure S1.** Effect of ATRA on preformed biofilm of *C. albicans*. 24-h old *C. albicans* biofilms were treated with ATRA at various concentrations (300 - 37.5 µg/mL) and further incubated for 24 h. Biofilm growth was analyzed as total biomass by crystal violet assay. The absorbance intensity of the crystal violet dye was measured using a spectrophotometer plate reader at 595 nm. Results are the means  $\pm$  SD of three independent experiments carried out in triplicate.
